# Supplementary material for: Effects of exercise combined with brain stimulation on hand function in children with cerebral palsy: a meta-analysis of randomized controlled trials
Source: PeerJ. 2026 Jan 29;14:e20670. doi: 10.7717/peerj.20670 (PMC12861132; doi:10.7717/peerj.20670)
Supplement: Supplemental Information 5 [file peerj-14-20670-s005.xlsx]

## Sheet: Sheet1
Gross motor function	EXP							CON
name	pre	SD	Post	SD	Different	SD	n	pre	SD	Post	SD	Different	SD	n
Ebrahimabadi 2024	35	4.99	51.72	4.12	16.72	4.61689	25	34.76	6.85	40.88	6.41	6.12	6.64094	25
Fajardo 2022	58.33	20.56	66.7	21.63	8.37	21.1153	14	47.49	27.17	49.12	26.64	1.63	26.9089	10
Fan 2024	50.9	18.4	75.7	17.9	24.8	18.15	16	50.25	15.25	63.6	16.4	13.35	15.9	16
Gillick 2018							10							10
Gupta 2023							23							23
Hassan 2024							14							14
He 2024	78.4	6.95	96.75	7	18.35	7	15	76.7	7.1	87.1	5.8	10.4	6.5	16
Wu 2022							17							18
Grip strength	EXP							CON
name	pre	SD	Post	SD	Different	SD	n	pre	SD	Post	SD	Different	SD	n
Ebrahimabadi 2024	29.72	3.29	43.04	2.39	13.32	2.94501	25	26.16	5.11	33.72	4.81	7.56	4.9668	25
Fajardo 2022							14							10
Fan 2024							16							16
Gillick 2018	7.7	4.2	8.2	4.8	0.5	4.5299	10	4.8	5.9	4.9	5.1	0.1	5.54346	10
Gupta 2023					12.03	5.34	23					10.88	4.02	23
Hassan 2024	7.14	2.18	12.6	2.97	5.46	2.66434	14	7.41	2.3	9.25	2.7	1.84	2.52389	14
He 2024							15							16
Wu 2022							17							18
Fine manual control	EXP							CON
name	pre		Post		Different		n	pre		Post		Different		n
Ebrahimabadi 2024	27.32	3.73	39.8	1.8	12.48	3.23093	25	26.52	4.44	34.36	5.01	7.84	4.75072	25
Fajardo 2022	16.71	7.55	20.85	6.94	4.14	7.26423	14	8.7	8.89	9.1	8.54	0.4	8.72027	10
Fan 2024							16							16
Gillick 2018	64.2	7.3	70.9	6.1	6.7	6.8	10	52.1	9.9	58.1	10.2	5.6	10.0534	10
Gupta 2023					6.55	6.44	23					3.9	7.72	23
Hassan 2024							14							14
He 2024							15							16
Wu 2022	82.59	15.2	90.35	10.5	7.76	13.4792	17	74.44	19.2	82.89	19.1	8.45	19.1502	18
